# Supplementary material for: Acidovorax citrulli Effector AopV Suppresses Plant Immunity and Interacts with Aromatic Dehydratase ADT6 in Watermelon
Source: MDPI journal article supplement (doi:10.3390/ijms231911719), 2022-10-03
Supplement: s1 [file s1]

# Supplementary Materials

Table S1: Primers used in this study; Table S2: Bacterial strains and plasmids used in this study;

**Table S1.** Strains and plasmids used in this study

| Strains and vectors                       | Characteristic                                                                                                                            | Source                  |
|-------------------------------------------|-------------------------------------------------------------------------------------------------------------------------------------------|-------------------------|
| Strains                                   |                                                                                                                                           |                         |
| <i>Acidovorax citrulli</i>                |                                                                                                                                           |                         |
| Aac5                                      | Wild type strain, Amp <sup>r</sup>                                                                                                        | This lab                |
| $\Delta hrpX$                             | <i>hrpX</i> markerless knock-out mutant of Aac5, Amp <sup>r</sup>                                                                         | This lab                |
| $\Delta hrpG$                             | <i>hrpG</i> markerless knock-out mutation of Aac5, Amp <sup>r</sup>                                                                       | This lab                |
| $\Delta hrcJ$                             | <i>hrcJ</i> markerless knock-out mutation of Aac5, Amp <sup>r</sup>                                                                       | This lab                |
| WT- <i>aopV</i> - <i>cyaA</i>             | Wild-type strain Aac5 containing pBBRNolac- <i>cyaA</i> carrying <i>aopV</i> with its native promoter; Amp <sup>r</sup> ; Km <sup>r</sup> | This study              |
| $\Delta hrcJ$ - <i>aopV</i> - <i>cyaA</i> | $\Delta hrcJ$ containing pBBRNolac- <i>cyaA</i> carrying <i>aopV</i> with its native promoter; Amp <sup>r</sup> ; Km <sup>r</sup>         | This study              |
| <i>Escherichia coli</i>                   |                                                                                                                                           |                         |
| DH5 $\alpha$                              | F-, <i>supE44</i> $\Delta lacU169$ ( $\Phi 80/lacZ\Delta M15$ ), <i>hsd R17</i> , <i>recA1</i> , <i>endA1</i> , <i>gyrA96thi-1 relA1</i>  | TIANGEN, Beijing, China |
| <i>Agrobacterium tumefaciens</i>          |                                                                                                                                           |                         |
| GV3101                                    | The wild-type strain, Rif <sup>r</sup>                                                                                                    | BIOMED, Beijing, China  |
| Vectors                                   |                                                                                                                                           |                         |
| pBBR1MCS-2                                | Broad host range expression vector with <i>lac</i> promoter, Km <sup>r</sup>                                                              | This lab                |
| pBBRNolac- <i>cyaA</i>                    | pBBRNolac-4FLAG containing <i>cyaA</i> gene without promoter                                                                              | This lab                |
| pBBRNolac- <i>aopV</i> - <i>cyaA</i>      | pBBRNolac- <i>cyaA</i> containing <i>Aave_3085</i> gene with its native promoter                                                          | This study              |
| pBI121                                    | Plant expression vector containing 35S promoter, Km <sup>r</sup>                                                                          | This study              |
| pBI121-3FLAG                              | pBI121 containing 3FLAG tag, Km <sup>r</sup>                                                                                              | This lab                |
| pBI121-eGFP                               | pBI121 containing eGFP tag, Km <sup>r</sup>                                                                                               | This lab                |
| pBI121-3FLAG-AopV                         | pBI121-3FLAG containing AopV                                                                                                              | This study              |
| pBI121-GFP-AopV                           | pBI121-GFP containing AopV                                                                                                                | This study              |
| pCAMBIA1300-nLUC                          | Plant expression vector containing 35S promoter, carrying nLUC tag, Km <sup>r</sup>                                                       | Lab collection          |
| pCAMBIA1300-cLUC                          | Plant expression vector containing 35S promoter, carrying cLUC tag, Km <sup>r</sup>                                                       | Lab collection          |
| pCAMBIA1300-nLUC-AopV                     | pCAMBIA 1300-cLUC fused with AopV for LCI assay, Km <sup>r</sup>                                                                          | This study              |

|                           |                                                                                        |                |
|---------------------------|----------------------------------------------------------------------------------------|----------------|
| pCAMBIA1300-cLU<br>C-ADT6 | pCAMBIA1300-cLUC fused with<br>ADT6 for LCI assay, Km <sup>r</sup>                     | This study     |
| pSPYNE®173                | Plant expression vector containing 35S<br>promoter, carrying nYFP tag, Km <sup>r</sup> | Lab collection |
| pSPYCE(M)                 | Plant expression vector containing 35S<br>promoter, carrying cYFP tag, Km <sup>r</sup> | Lab collection |
| pSPYNE®173-AopV           | pSPYNE®173 containing AopV for<br>BiFC assay, Km <sup>r</sup>                          | This study     |
| pSPYCE(M)-ADT6            | pSPYCE(M) containing ADT6 for<br>BiFC assay, Km <sup>r</sup>                           | This study     |
| pGBKT7-53                 | Positive control bait                                                                  | Lab collection |
| pGADT7-T                  | Positive control prey                                                                  | Lab collection |
| pGBKT7-Lam                | Negative control bait                                                                  | Lab collection |
| pGBKT7-AopV               | pGBKT7 containing AopV for yeast<br>two hybrid assay, Km <sup>r</sup>                  | This study     |
| pGADT7-ADT6               | pGADT7 containing ADT6 for yeast<br>two hybrid assay, Amp <sup>r</sup>                 | This study     |

The Km<sup>r</sup>, Amp<sup>r</sup> and Rif<sup>r</sup> indicate resistance to kanamycin, ampicillin, and rifampicin, respectively.

**Table S2.** Primers used in this study

| Primer name                | Primer sequence (5'-3')                        | Description                                                                                                                                                 |
|----------------------------|------------------------------------------------|-------------------------------------------------------------------------------------------------------------------------------------------------------------|
| HB- <i>aopV</i> -F         | CTAGTTCTAGAGCGGCCGCCA                          | For cloning the <i>aopV</i><br>full-length open reading<br>frame (ORF) with its native<br>promoter in the<br>pBBRNolac- <i>aopV</i> - <i>cyaA</i><br>vector |
| HB- <i>aopV</i> -R         | GGTACCGGGCCCCCTCGAG                            |                                                                                                                                                             |
| RT- <i>aopV</i> -F         | CCGTCAGGCGAGTCATTTCT                           | For detecting <i>aopV</i> mRNA<br>in RT-qPCR assay                                                                                                          |
| RT- <i>aopV</i> -R         | TTAGGGCTATGTGTTCCGGC                           |                                                                                                                                                             |
| 121GFP- <i>aopV</i> -F     | GAGCTGGACAAGGGTCTAGACGA<br>AGATGCGGCTGTGGAA    | For cloning the <i>aopV</i><br>full-length ORF into<br>pBI121-eGFP vector                                                                                   |
| 121GFP- <i>aopV</i> -R     | TCTATCGATCAATCAGGATCCCCC<br>CGGAGCGCGCGGCGCC   |                                                                                                                                                             |
| <i>Ac</i> - <i>cyaA</i> -F | TCCCCCGGGCTGCAGGAATTC<br>GATGGGCAGCAATCGCATCA  | For cloning the <i>cyaA</i> into<br>pBBRNolac vector to<br>construct the<br>pBBRNolac- <i>cyaA</i> vector                                                   |
| <i>Ac</i> - <i>cyaA</i> -R | ATCCTTGTAATCGGTAAGCTT<br>GCTGTCATAGCCGGAATCCT  |                                                                                                                                                             |
| 121FLAG- <i>aopV</i> -F    | GAGAACACGGGGGACTCTAGCG<br>AAGATGCGGCTGTGGAA    | For cloning the <i>aopV</i><br>full-length ORF in<br>pBI121-3FLAG vector                                                                                    |
| 121FLAG- <i>aopV</i> -R    | GTCATCCTTGTAATCCCCGGCCCC<br>GGAGCGCGCGGCGCC    |                                                                                                                                                             |
| 121FLAG-F                  | GGACTCTAGAGGATCCCCGGGGA<br>TTACAAGGATGAC       | For inserting the 3FLAG<br>tag into pBI121 vector to<br>construct the<br>pBI121-3FLAG vector                                                                |
| 121-FLAG-R                 | CGATCGGGGAAATTCGAGCTCTC<br>ACTTGTCATCGTCAT     |                                                                                                                                                             |
| 121GFP-F                   | GGACTCTAGAGGATCCCCGGGAT<br>GGTGAGCAAGGGCGAG    | For inserting the eGFP tag<br>into pBI121 vector to<br>construct the pBI121-eGFP<br>vector                                                                  |
| 121GFP-R                   | CGATCGGGGAAATTCGAGCTCTC<br>ACTTGACAGCTCGTCCATG |                                                                                                                                                             |
| RT- <i>rpoB</i> -F         | GCGACAGCGTGCTCAAAGTG                           | Reference gene of <i>A. citrulli</i>                                                                                                                        |

|                                    |                                                |                                                                          |
|------------------------------------|------------------------------------------------|--------------------------------------------------------------------------|
| RT- <i>rpoB</i> -F                 | GCCTTCGTTGGTGCGTTTCT                           | strain Aac5 in RT-qPCR assay                                             |
| <i>NbAcre31</i> -F                 | AATTCGGCCATCGTGATCTTGGTC                       | For detecting <i>NbAcre31</i> mRNA in RT-qPCR assay                      |
| <i>NbAcre31</i> -R                 | GAGAAACTGGGATTGCCTGAAGG<br>A                   |                                                                          |
| <i>NbEF1<math>\alpha</math></i> -F | AAGGTCCAGTATGCCTGGGTGCTT<br>GAC                | Reference gene of <i>N. benthamiana</i> in RT-qPCR assay                 |
| <i>NbEF1<math>\alpha</math></i> -R | AAGAATTCACAGGGACAGTTCCA<br>ATACCA              |                                                                          |
| <i>NbPti5</i> -F                   | CCTCCAAGTTTGAGCTCGGATAGT                       | For detecting <i>NbPti5</i> mRNA in RT-qPCR assay                        |
| <i>NbPti5</i> -R                   | CCAAGAAATTCTCCATGCACTCT<br>GTC                 |                                                                          |
| AD-ADT6-F                          | GCCATGGAGGCCAGTGAATTCAT<br>GGACGCTCAGAACTTCACG | For cloning the <i>ADT6</i> into pGADT7-T vector                         |
| AD-ADT6-R                          | CAGCTCGAGCTCGATGGATCCTC<br>AAGCACTTTTGGGGCCAA  |                                                                          |
| nLUC- <i>aopV</i> -F               | ACGGGGGACGAGCTCGGTACCGA<br>AGATGCGGCTGTGGAA    | For cloning the <i>aopV</i> into pCAMBIA1300-nLUC vector                 |
| nLUC- <i>aopV</i> -R               | CGCGTACGAGATCTGGTTCGACCC<br>CGGAGCGCGCGGCGCC   |                                                                          |
| cLUC-ADT6-F                        | TACGCGTCCCGGGGCGGTACATG<br>GACGCTCAGAACTTC     | For cloning the <i>ADT6</i> full-length ORF into pCAMBIA1300-cLUC vector |
| cLUC-ADT6-R                        | ACGAAAGCTCTGCAGGTCTGAAGC<br>ACTTTTGGGGCCAATG   |                                                                          |
| 173-AopV-F                         | CCCAGGCCTACTAGTGGATCCGA<br>AGATGCGGCTGTGGAA    | For cloning the <i>aopV</i> into pSPYNE <sup>®</sup> 173 vector          |
| 173-AopV-R                         | CCCGGGAGCGGTACCCTCGACCC<br>CGGAGCGCGCGGCGCC    |                                                                          |
| M-ADT6-F                           | TGGCGCGCCACTAGTGGATCATG<br>GACGCTCAGAACTTC     | For cloning the <i>ADT6</i> into pSPYCE(M) vector                        |
| M-ADT6-R                           | CCCGGGAGCGGTACCCTCGAGAG<br>CACTTTTGGGGCCAATG   |                                                                          |
